# Supplementary material for: Detection of carbofuran in fruits and vegetables by Raman spectroscopy combined with immunochromatography
Source: Royal Society of Chemistry journal article supplement (doi:10.1039/d4ay00490f), 2024-01-01
Supplement: d4ay00490f1.pdf [file d4ay00490f1.pdf]

Corrected for gold and silver materials, the material refractive index real and imaginary parts are fitted well in the range of 0.3-0.6  $\mu\text{m}$ , as shown in Fig. 1, (a) for the Au real part and (b) for the Au imaginary part, and (c) for the Ag real part and (d) for the Ag imaginary part, which demonstrates the appropriateness of choosing the material properties of Au and Ag for the simulation.

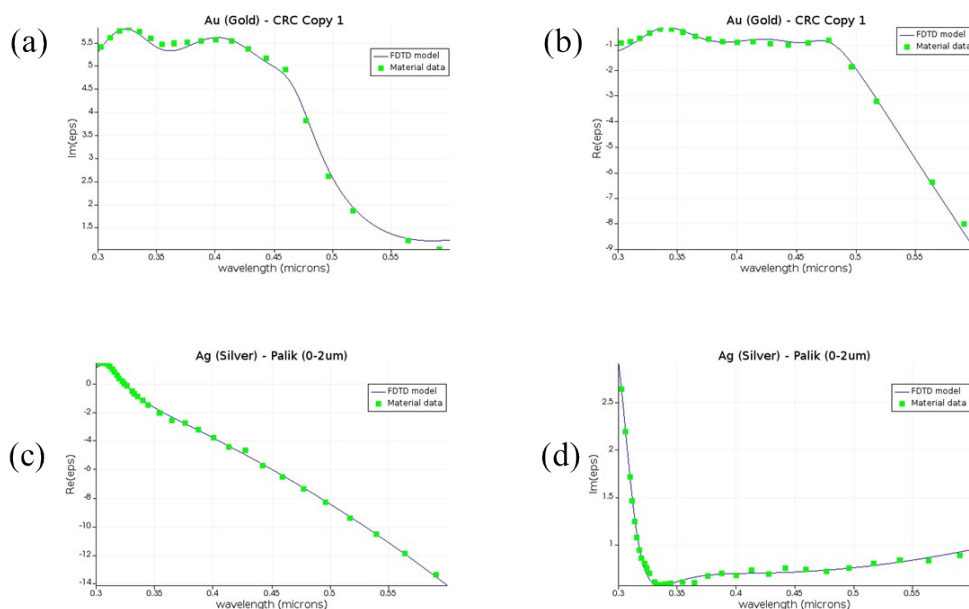

Fig.1 Material properties of Ag@AuNPs (a) Au material properties modified real part, (b) Au material properties modified imaginary part, (c) Ag material properties modified real part, (d) Ag material properties modified imaginary part
